# Supplementary material
Source: MDPI journal article supplement (https://www.mdpi.com/2071-1050/15/24/16556)
Supplement: s1 [file s1]

# **Electrochemical Recovery of Phosphorus from Simulated and Real Wastewater: Effect of Investigational Conditions on the Process Efficiency**

**Carlos Y. Sousa \*, Annabel Fernandes, Albertina Amaro, Maria José Pacheco, Lurdes Ciriaco and Ana Lopes**

FibEnTech-UBI, Department of Chemistry, Universidade da Beira Interior (UBI), 6201-001 Covilhã, Portugal; annabelf@ubi.pt (A.F.); albertina.amaro@ubi.pt (A.A.); mjap@ubi.pt (M.J.P.); lciriaco@ubi.pt (L.C.); analopes@ubi.pt (A.L.)

\* Correspondence: carlos.vieira.sousa@ubi.pt

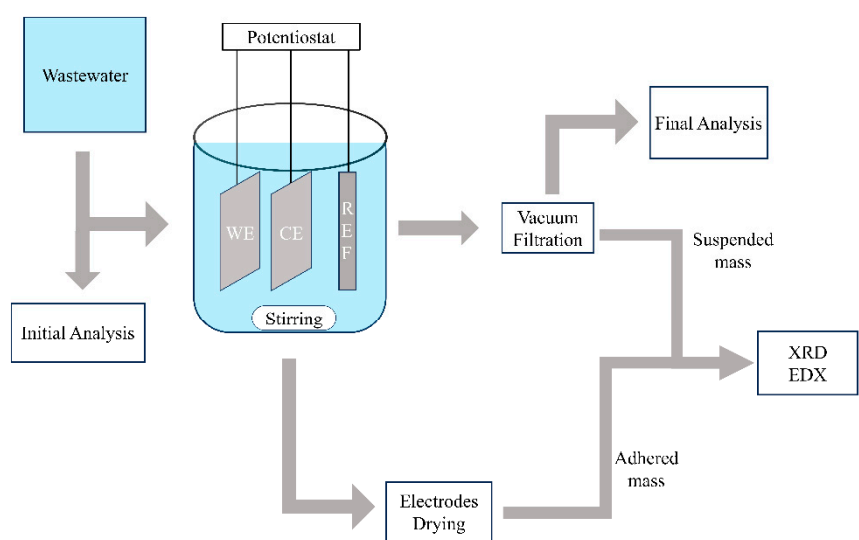

**Figure S1.** Diagram of experimental setup

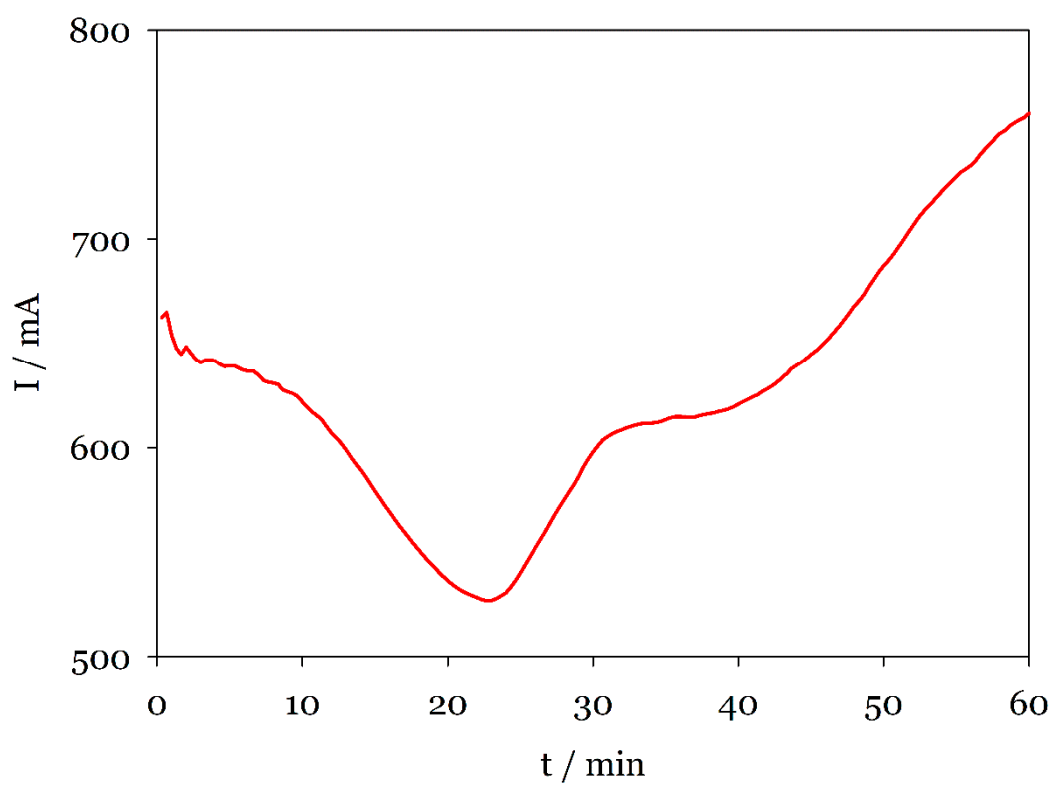

**Figure S2.** Current behavior during real wastewater treatment
